# Supplementary material
Source: HighWire-hosted journal article supplement (https://cmaj.ca/highwire/filestream/59950/field_highwire_adjunct_files/3/161064-res-4-at.pdf)
Supplement: 161064-res-4-at.pdf [file 161064-res-4-at.pdf]

**Appendix 4 (as supplied by the authors): Odds ratio for hospitalization and death due to myocardial infarction the day following a snowfall according to material deprivation\***

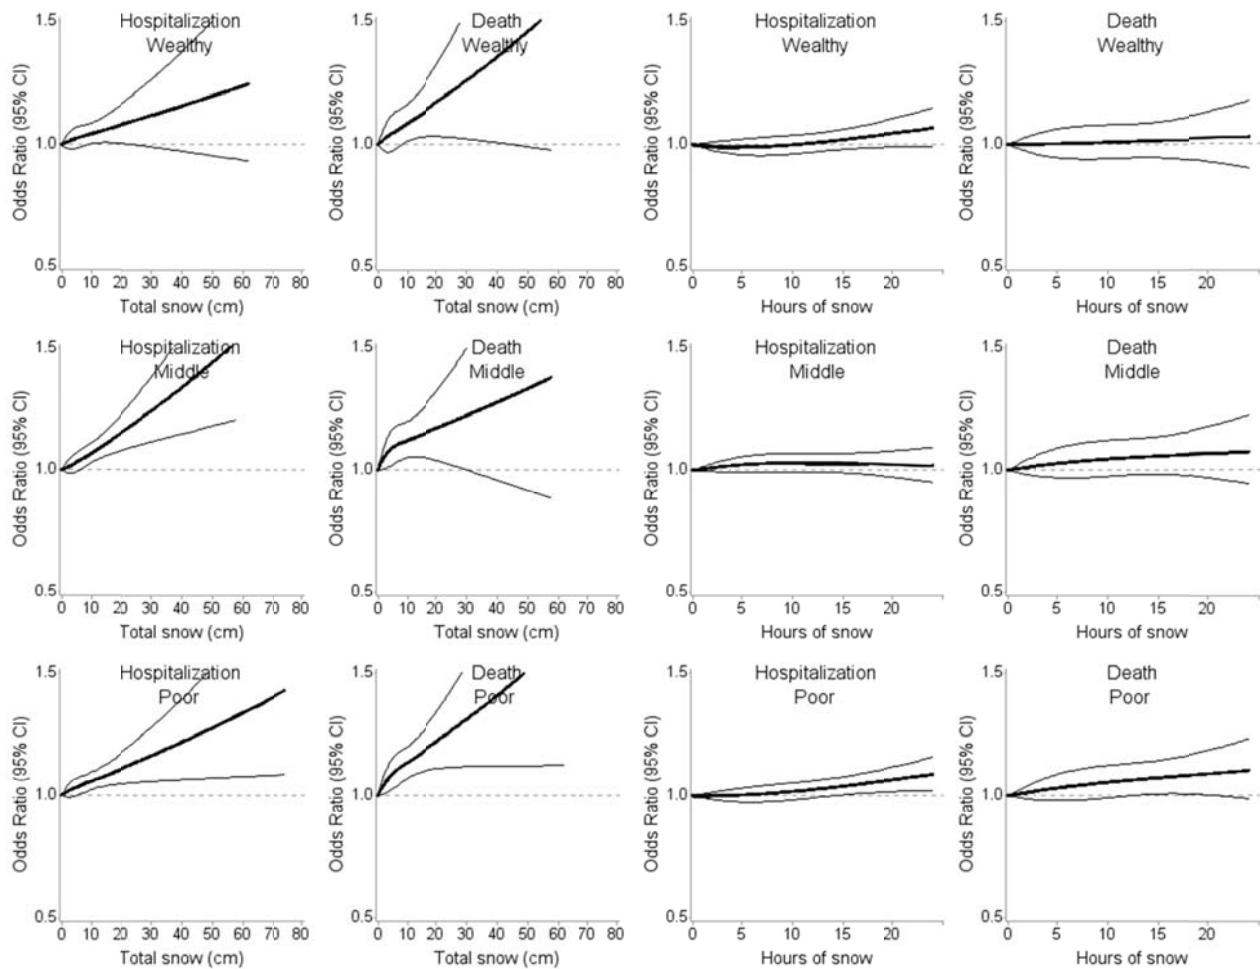

\* Odds ratio (central line) and 95% confidence interval (outer bands), adjusted for temperature. Left-sided panels are for quantity of snowfall. Right-sided panels are for duration of snowfall (excludes MI events with missing data).
